# Supplementary material for: The Legionella Kinase LegK2 Targets the ARP2/3 Complex To Inhibit Actin Nucleation on Phagosomes and Allow Bacterial Evasion of the Late Endocytic Pathway
Source: PubMed Central journal article supplement — mBio. 2015 May 5;6(3):e00354-15. doi: 10.1128/mBio.00354-15 (PMC4436068; doi:10.1128/mbio.00354-15), 2015-05-05
Supplement: mbo002152300s1.pdf [file mbo002152300s1.pdf]

## Supplemental References

- Amrein, K., Takacs, B., Stieger, M., Molnos, J., Flint, N. and Burn, P. (1995). Purification and characterization of recombinant human p50csk protein-tyrosine kinase from an Escherichia coli expression system overproducing the bacterial chaperones GroES and GroEL. *Proc Natl Acad Sci U S A* **92**, 1048-1052.
- Cazalet, C., Rusniok, C., Bruggemann, H., Zidane, N., Magnier, A., Ma, L., *et al.* (2004). Evidence in the Legionella pneumophila genome for exploitation of host cell functions and high genome plasticity. *Nature Genetics* **36**, 1165-1173.
- Dolezal, P., Aili, M., Tong, J., Jiang, J.H., Marobbio, C.M., Lee, S.F., *et al.* (2012). Legionella pneumophila secretes a mitochondrial carrier protein during infection. *PLoS Pathog* **8**, e1002459.
- Ferhat, M., Atlan, D., Vianney, A., Lazzaroni, J., Doublet, P. and Gilbert, C. (2009). The TolC protein of Legionella pneumophila plays a major role in multi-drug resistance and the early steps of host invasion. *PLoS One* **4**, e7732.
- Hervet, E., Charpentier, X., Vianney, A., Lazzaroni, J.C., Gilbert, C., Atlan, D. and Doublet, P. (2011). Protein kinase LegK2 is a type IV secretion system effector involved in endoplasmic reticulum recruitment and intracellular replication of Legionella pneumophila. *Infect Immun* **79**, 1936-1950.
- Watts, D.J. and Ashworth, J.M. (1970). Growth of myxameobae of the cellular slime mould Dictyostelium discoideum in axenic culture. *Biochem J* **119**, 171-174.
