# Supplementary material for: The Legionella Kinase LegK2 Targets the ARP2/3 Complex To Inhibit Actin Nucleation on Phagosomes and Allow Bacterial Evasion of the Late Endocytic Pathway
Source: PubMed Central journal article supplement — mBio. 2015 May 5;6(3):e00354-15. doi: 10.1128/mBio.00354-15 (PMC4436068; doi:10.1128/mbio.00354-15), 2015-05-05
Supplement: mbo002152300st1.pdf [file mbo002152300st1.pdf]

**Table S1: Strains and plasmids used in this study, related to experimental procedures**

| Strain or plasmid                      | Relevant properties                                                                                                                                                                                                                                                  | Reference                      |
|----------------------------------------|----------------------------------------------------------------------------------------------------------------------------------------------------------------------------------------------------------------------------------------------------------------------|--------------------------------|
| <b><i>E. coli</i></b>                  |                                                                                                                                                                                                                                                                      |                                |
| XL1-Blue                               | <i>endA1 gyrA96(nal<sup>R</sup>) thi-1 recA1 relA1 lac glnV44</i>                                                                                                                                                                                                    | Stratagene                     |
| BL21(DE3)(pREP4- <i>groESL</i> )       | <i>F'[::Tn10 proAB<sup>+</sup> lacI<sup>q</sup> Δ(lacZ)M15] hsdR17(r<sub>K</sub><sup>-</sup> m<sub>K</sub><sup>+</sup>)</i>                                                                                                                                          | (Amrein <i>et al.</i> , 1995)  |
| NEB 5-alpha (High Efficiency)          | <i>F<sup>-</sup> ompT gal dcm lon hsdS<sub>B</sub>(r<sub>B</sub><sup>-</sup> m<sub>B</sub><sup>-</sup>) λ(DE3 [lacI lacUV5-T7 gene 1 ind1 sam7 nin5])</i><br><i>fhuA2Δ(argF-lacZ)U169 phoA glnV44 Φ80 Δ(lacZ)M15</i><br><i>gyrA96 recA1 relA1 endA1 thi-1 hsdR17</i> | BioLabs                        |
| <b><i>L. pneumophila</i></b>           |                                                                                                                                                                                                                                                                      |                                |
| CIP 108286                             | Virulent <i>L. pneumophila</i> serogroup 1, strain Lens                                                                                                                                                                                                              | (Cazalet <i>et al.</i> , 2004) |
| Δ <i>dotA</i>                          | Lens <i>lpl2613::Km</i>                                                                                                                                                                                                                                              | (Ferhat <i>et al.</i> , 2009)  |
| Δ <i>legK2</i>                         | Lens <i>lpl2066::Km</i>                                                                                                                                                                                                                                              | (Hervet <i>et al.</i> , 2011)  |
| <b><i>Listeria monocytogenes</i></b>   |                                                                                                                                                                                                                                                                      |                                |
| EGDe.PrfA*(BUG 3057)                   |                                                                                                                                                                                                                                                                      | Institut Pasteur               |
| <b><i>D. discoideum</i></b>            |                                                                                                                                                                                                                                                                      |                                |
| DBS0235534                             | AX2-214                                                                                                                                                                                                                                                              | (Watts <i>et al.</i> , 1970)   |
| <b><i>Acanthamoeba castellanii</i></b> |                                                                                                                                                                                                                                                                      |                                |
|                                        | Environmental isolate                                                                                                                                                                                                                                                | L. LeClaire                    |
| <b>Mammalian cells</b>                 |                                                                                                                                                                                                                                                                      |                                |
| HEK293T                                |                                                                                                                                                                                                                                                                      | INSERM U1111,<br>Lyon, France  |
| HeLa                                   |                                                                                                                                                                                                                                                                      | INSERM U1111,<br>Lyon, France  |
| HeLa CCL-2                             |                                                                                                                                                                                                                                                                      | ATCC                           |
| <b><i>S. cerevisiae</i></b>            |                                                                                                                                                                                                                                                                      |                                |
| AH109                                  | MATa, <i>trp1-901, leu2-3, 112, ura3-52, his3-200, gal4Δ, gal80Δ, LYS2::GAL1<sub>UAS</sub>-GAL1<sub>TATA</sub>-HS3, MEL1 GAL2<sub>UAS</sub>-GAL2<sub>TATA</sub>-ADE2, URA3::MEL1<sub>UAS</sub>-MEL1<sub>TATA</sub>-lacZ</i>                                          | Clontech                       |
| Y187                                   | <i>MATa, ura3-52, his3-200, ade2-101, trp1-901, leu2-3, 112, gal4Δ, met-, gal80Δ, MEL1, URA3::GAL1<sub>UAS</sub>-GAL1<sub>TATA</sub>-lacZ</i>                                                                                                                        | Clontech                       |
| <b>Plasmids</b>                        |                                                                                                                                                                                                                                                                      |                                |
| pGEX- <i>legK2</i>                     | <i>lpl2066</i> inserted in BamHI-Sall of pGEX-6P-3 for GST-LegK2 overproduction                                                                                                                                                                                      | (Hervet <i>et al.</i> , 2011)  |
| pDONR <sup>TM</sup> 207                | Gateway donor vector                                                                                                                                                                                                                                                 | Invitrogen                     |
| pDONR <sup>TM</sup> 207- <i>legK1</i>  | <i>lpl1545</i> inserted in Gateway donor vector                                                                                                                                                                                                                      | This work                      |
| pDONR <sup>TM</sup> 207- <i>legK2</i>  | <i>lpl2066</i> inserted in Gateway donor vector                                                                                                                                                                                                                      | This work                      |
| pDONR <sup>TM</sup> 223-ARPC1B         | Human ARPC1B inserted in Gateway donor vector                                                                                                                                                                                                                        | INSERM U1111,<br>Lyon, France  |
| pDONR <sup>TM</sup> 223-ACTR3          | Human ACTR3 inserted in Gateway donor vector                                                                                                                                                                                                                         | INSERM U1111,<br>Lyon, France  |
| pGBKT7                                 | Gateway yeast expression vector                                                                                                                                                                                                                                      | Clontech                       |
| pGBKT7- <i>legK1</i>                   | <i>lpl1545</i> inserted in Gateway yeast expression vector for                                                                                                                                                                                                       | This work                      |

|                                        |                                                                                                                                                                 |                                |
|----------------------------------------|-----------------------------------------------------------------------------------------------------------------------------------------------------------------|--------------------------------|
|                                        | BD-LegK1 overexpression                                                                                                                                         |                                |
| pGBKT7- <i>legK2</i>                   | <i>lpl2066</i> inserted in Gateway yeast expression vector for BD-LegK2 overexpression                                                                          | This work                      |
| pACT2                                  | Gateway yeast expression vector                                                                                                                                 | Clontech                       |
| pACT2-ARPC1B                           | Human ARPC1B inserted in Gateway yeast expression vector for AD-ARPC1B overexpression                                                                           | This work                      |
| pACT2-ACTR3                            | Human ACTR3 inserted in Gateway yeast expression vector for AD-ARP3 overexpression                                                                              | This work                      |
| pDEST27                                | Gateway mammalian expression vector                                                                                                                             | Invitrogen                     |
| pDEST27- <i>legK2</i>                  | <i>lpl2066</i> inserted in Gateway mammalian expression vector for GST-LegK2 overexpression                                                                     | This work                      |
| pDEST27- <i>legK2</i> <sub>K112M</sub> | <i>lpl2066</i> <sub>K112M</sub> inserted in Gateway mammalian expression vector for GST-LegK2 <sub>K112M</sub> overexpression                                   | This work                      |
| pCI-Neo3Flag                           | Gateway mammalian expression vector                                                                                                                             | Invitrogen                     |
| pCI-Neo3Flag-ARPC1B                    | Human ARPC1B inserted in Gateway mammalian expression vector for 3Flag-ARPC1B overexpression                                                                    | This work                      |
| pCI-Neo3Flag-ACTR3                     | Human ACTR3 inserted in Gateway mammalian expression vector for 3Flag-ARP3 overexpression                                                                       | This work                      |
| peGFP                                  | Gateway mammalian expression vector                                                                                                                             | INSERM U1111,<br>Lyon, France  |
| peGFP- <i>legK2</i>                    | <i>lpl2066</i> inserted in Gateway mammalian expression vector for GFP-LegK2 overexpression                                                                     | This work                      |
| peGFP- <i>legK2</i> <sub>K112M</sub>   | <i>lpl2066</i> <sub>K112M</sub> inserted in Gateway mammalian expression vector for GFP-LegK2 <sub>K112M</sub> overexpression                                   | This work                      |
| <i>plegK2</i>                          | pXDC50 derivative <i>Legionella</i> expression vector carrying <i>mCherry</i> . Expression of <i>lpl2066</i> under its promoter (400 bp)                        | (Hervet <i>et al.</i> , 2011)  |
| <i>plegK2cat</i>                       | pXDC50 derivative <i>Legionella</i> expression vector carrying <i>mCherry</i> . Expression of <i>lpl2066</i> <sub>K112M/D209N</sub> under its promoter (400 bp) | This work                      |
| pXDC61- <i>legK2</i>                   | Encodes for $\beta$ -lactamase-LegK2 fusion                                                                                                                     | INSERM U1111,<br>Lyon, France  |
| pMMB207c-HA*4                          | pXDC61 derivative with <i>blaM</i> gene replaced by 4 HA tags                                                                                                   | (Dolezal <i>et al.</i> , 2012) |
| p4HA- <i>legK2</i>                     | <i>Lpl2066</i> inserted in pMMB207c-HA*4 to encode HA tagged LegK2                                                                                              | This work                      |
