# Supplementary material for: The Legionella Kinase LegK2 Targets the ARP2/3 Complex To Inhibit Actin Nucleation on Phagosomes and Allow Bacterial Evasion of the Late Endocytic Pathway
Source: PubMed Central journal article supplement — mBio. 2015 May 5;6(3):e00354-15. doi: 10.1128/mBio.00354-15 (PMC4436068; doi:10.1128/mbio.00354-15), 2015-05-05
Supplement: mbo002152300st2.pdf [file mbo002152300st2.pdf]

**Table S2: Primers used in this study, related to experimental procedures.**

|   | <b>Name</b>                                        | <b>Sequence</b>                                        | <b>Description</b>                           |
|---|----------------------------------------------------|--------------------------------------------------------|----------------------------------------------|
| 1 | <i>legK2</i> <sub>K112M</sub> <sup>-</sup><br>sens | CCCAAAGAGAATATACTGATGGTTTTATATCAAAATTTTAGTAATGTCG      | <i>legK2</i><br>mutagenesis                  |
| 2 | <i>legK2</i> <sub>K112M</sub> <sup>-</sup><br>rev  | CGACATTACTAAAATTTTGATATAAAAACCATCAGTATATTCTCTTTGGG     | <i>legK2</i><br>mutagenesis                  |
| 3 | <i>legK2</i> <sub>D209N</sub> <sup>-</sup><br>sens | CATAACAAAGGCTACGCCCATGGCAATTTAACTTTCAAAAATATTTTATA     | <i>legK2</i><br>mutagenesis                  |
| 4 | <i>legK2</i> <sub>D209N</sub> <sup>-</sup><br>rev  | TATAAAATATTTTTGAAAGTTAAATTGCCATGGGCGTAGCCTTTGTTATG     | <i>legK2</i><br>mutagenesis                  |
| 5 | GW5- <i>legK1</i>                                  | GGGGACAACCTTTGTACAAAAAAGTTGGCATGCCTCGTACAATGTTTTTTTCC  | <i>legK1</i><br>insertion in<br>donor vector |
| 6 | GW3- <i>legK1</i>                                  | GGGGACAACCTTTGTACAAGAAAGTTGGTTACTCAGCCACTAACCATAAGGC   | <i>legK1</i><br>insertion in<br>donor vector |
| 7 | GW5- <i>legK2</i>                                  | GGGGACAACCTTTGTACAAAAAAGTTGGCATGGTTTATTACATAAATTTGAAGG | <i>legK2</i><br>insertion in<br>donor vector |
| 8 | GW3- <i>legK2</i>                                  | GGGGACAACCTTTGTACAAGAAAGTTGGTTAGCTTGGGCCTCGCATC        | <i>legK2</i><br>insertion in<br>donor vector |
